# Supplementary material for: High resolution observations of the ocean upper layer south of Cape São Vicente, western northern margin of the Gulf of Cadiz
Source: Copernicus journal article supplement (doi:10.5194/essd-2023-436), 2023-12-18
Supplement: Supplementary file [file essd-2023-436-AC2-supplement.pdf]

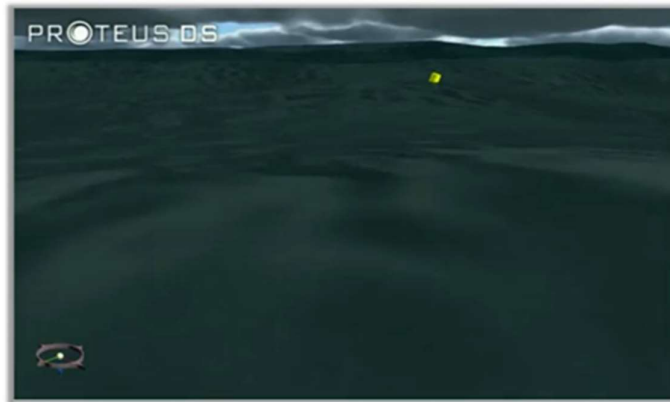

| daN       | A (Buoy) |     | B (Down-weight) |     | C (Float I) |     | D (Release) |     |
|-----------|----------|-----|-----------------|-----|-------------|-----|-------------|-----|
|           | Max      | Avg | Max             | Avg | Max         | Avg | Max         | Avg |
| "Normal"  | 70       | 56  | 33              | 28  | 12          | 9   | 18          | 14  |
| "Storm"   | 126      | 76  | 100             | 51  | 84          | 36  | 88          | 41  |
| "Extreme" | 335      | 120 | 317             | 100 | 302         | 86  | 306         | 91  |

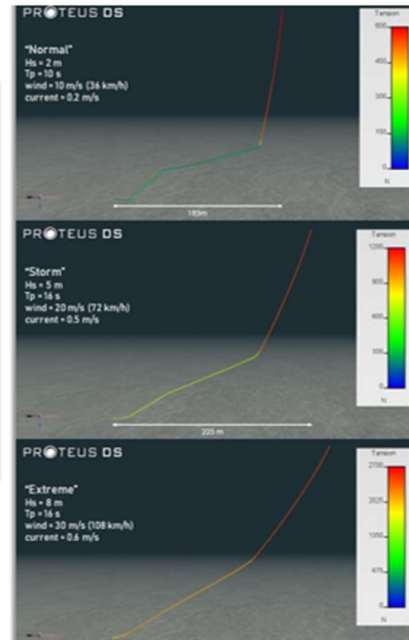

Figure 1. Sample of obtained results from Proteus DS according to defined scenarios for the vertical profiler mooring.
